# Supplementary material
Source: publisher figshare collection journal article supplement (https://gsapubs.figshare.com/ndownloader/files/22745903)
Supplement: Supplementary file 1 [file 22745903]

## The cold event 8200 years ago recorded in annually laminated lake sediments in Eastern Europe

Siim Veski, Heikki Seppä, Antti E. K. Ojala

**DR1.** The annual nature of the laminations at the top of the core was independently verified with  $^{210}\text{Pb}$  datings and by detecting  $^{137}\text{Cs}$ ,  $^{241}\text{Am}$ , and carbonaceous fly-ash marker layers. The  $^{210}\text{Pb}$  chronology based on 15 samples fits well with the varve counts within its uncertainty range. The levels of the 1986 Chernobyl event and 1963 atmospheric nuclear bomb tests determined from the  $^{137}\text{Cs}$  and  $^{241}\text{Am}$  stratigraphy fall into the varve count within  $\pm 1$  year. A characteristic spherical fly-ash particle marker layer in the 1940s (Alliksaar et al., 1998) coincides with the varve chronology.

**DR2.** The results of the 4 out of 5 AMS dates on terrestrial macrophytes fit into the combined varve and paleomagnetic chronology of the Lake Rõuge sediment sequence.  $^{14}\text{C}$  dates were calibrated with CALIB 4.2 program (Stuiver & Reimer, 1993), using the INTCAL98 calibration data (Stuiver et al., 1998). The bidecadal tree-ring data set A was used for calibration and a 10-sample smoothing was applied to the calibration curve.

| Depth (cm) | $^{14}\text{C}$ age (yr BP) | Calibrated age (cal yr BP $1\sigma$ range) | Laboratory number | Dated material     | Comparative varve age |
|------------|-----------------------------|--------------------------------------------|-------------------|--------------------|-----------------------|
| 197 – 200  | $1400 \pm 50$               | 1275 – 1350                                | Ua-19790          | Mixed macrofossils | 1365 – 1408           |
| 359 – 361  | $3230 \pm 60$               | 3370 – 3550                                | Ua-19532          | Wood               | 3977 – 4010           |
| 453        | $4830 \pm 45$               | 5480 – 5610                                | Ua-21327          | Wood               | 5470 – 5500           |
| 632 – 633  | $9145 \pm 65$               | 10220 – 10400                              | Ua-21328          | Wood               | Outlier               |
| 667 – 670  | $9160 \pm 95$               | 10220 – 10480                              | Ua-18439          | Mixed macrofossils | 10300 – 10400*        |

\*Estimated by extrapolating from the lower varve contact at  $9400 \pm 85$  years at a constant sedimentation rate

**DR3.** The pollen samples were prepared following standard methods (Berglund and Ralska-Jasiewiczowa, 1986) with *Lycopodium* spores added to calculate pollen influx (Stockmarr, 1971). At least 500 arboreal pollen grains were counted at each sample level. The percentages of terrestrial pollen and spore taxa were calculated on the basis of their total sum. Stable isotopic analyses were carried out with a Delta E (Finnigan MAT) mass spectrometer at the Isotope-Paleoclimatology Laboratory, Tallinn Technical University. Lake marl was decomposed on 100% phosphoric acid at 50 °C. The results are presented in the usual  $\delta$  notation, as per mil (‰) deviation from the VPDB standard. Reproducibility of the replicate analyses (7 out of 37) was generally better than 0.1%.

**DR4.** The pollen-climate calibration set ranges from the Hemiboreal Zone in Southern Estonia to the oroarctic heaths of northernmost Fennoscandia. The gradient of the  $T_{\text{ann}}$  in the region is  $10.2\text{ }^{\circ}\text{C}$  ( $5.5$  to  $-4.7\text{ }^{\circ}\text{C}$ ). The pollen surface samples (top  $\sim 10\text{ mm}$ ) were collected from small- to medium-sized lakes in 1997 and 2002. The samples were prepared and analyzed in a standardized way by one analyst. The transfer functions and sample-specific reconstruction errors were generated with the CALIBRATE 0.81 and WAPLS programs (ter Braak and Juggins, 1993). For the reconstruction, a 2-component model of the WA-PLS method was chosen on the basis of the lowest RMSEP and highest  $r^2$ . In the leave-one-out cross-validation (jack-knifing) the modern  $T_{\text{ann}}$  is reconstructed or ‘predicted’  $n$  times using a training set of size  $n-1$ , omitting the sample from the site for which the modern climate is predicted (Birks, 1995). The transfer functions were developed using all terrestrial pollen and spore types, with their percentages transformed to square-roots to optimize the ‘signal-to-noise’ ratio and stabilize the variances (S5). The RMSEP as a percentage of the gradient length of  $T_{\text{ann}}$  is 8.8%.

**DR5.** A blowup of trends in the Lake Rõuge  $T_{\text{ann}}$  reconstruction (black line) and the NorthGRIP  $\delta^{18}\text{O}$  record (grey bars) at 8800–7800 years ago. Both records have independent chronologies.

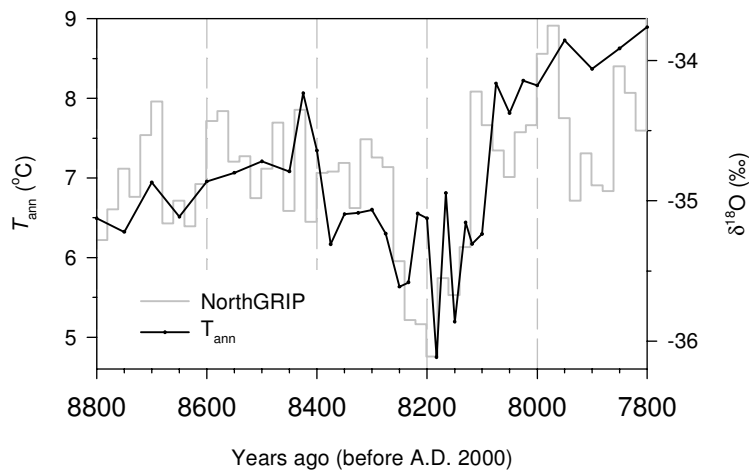

**DR6.** The measured varve thickness (total, organic, and minerogenic parts separately) proxy at Lake Rõuge was analyzed statistically to determine the correlation between varves and instrumentally measured runoff data at the stream running through the lake for the period 1983–1996. The results show that the correlation coefficient between varve thickness and annual runoff is 0.52 and winter/spring runoff 0.68. This supports the idea that lighter and more clastic varves show the intensity of the spring flood during snowmelt and indicate particularly severe and snow-rich winters.

## CITED REFERENCES

- Alliksaar, T., Hörstedt, P., and Renberg, I., 1998, Characteristic fly-ash particles from oil shale combustion found in lake sediments: *Water, Air and Soil Pollution*, v. 104, p. 149–160.
- Berglund, B.E., and Ralska-Jasiewiczowa, M., 1986, Pollenanalysis and pollendiagrams, *in* Berglund, B.E., ed., *Handbook of Holocene palaeoecology and palaeohydrology*: Chichester, John Wiley & Sons, p. 455–484.
- Birks, H.J.B., 1995, Quantitative palaeoenvironmental reconstructions, *in* Maddy, D., and Brew, J.S., eds., *Statistical Modelling of Quaternary Science Data: Technical Guide 5*: Cambridge, Quaternary Research Association, p. 161–254.
- Stockmarr, J., 1971, Tablets with spores used in absolute pollen analysis: *Pollen et Spores*, v. 13, p. 615–621.
- Stuiver, M. and Reimer, P.J. 1993, Extended  $^{14}\text{C}$  data base and revised CALIB 3.0  $^{14}\text{C}$  age calibration program. *Radiocarbon*, v. 35, p. 215–230.
- Stuiver, M., Reimer, P.J., Bard, E., Beck, J.W., Burr, G.S., Hughen, K.A., Kromer, B., McCormac, G., van der Plicht, J. and Spurk, M., 1998, 1998 INTCAL98 radiocarbon age calibration, 24,000 – 0 cal BP. *Radiocarbon*, v. 40, p. 10141–1083.
- ter Braak, C.J.F., and Juggins, S., 1993, Weighted averaging partial least squares regression (WA-PLS): an improved method for reconstructing environmental variables from species assemblages: *Hydrobiologia*, v. 269/270, p. 485–502.
